# Supplementary material for: Pan-Cancer Analysis Reveals the Signature of TMC Family of Genes as a Promising Biomarker for Prognosis and Immunotherapeutic Response
Source: Front Immunol. 2021 Nov 9;12:715508. doi: 10.3389/fimmu.2021.715508 (PMC8660091; doi:10.3389/fimmu.2021.715508)
Supplement: Supplementary file 2 [file Table_2.xlsx]

## Sheet: Sheet1
Table S2. GEO expression pan-cancer datasets
Cancer	No. of Sample	No. of Series	Series
ACC	91	12	GSE19750,GSE19776,GSE8514,GSE28476,GSE17312,GSE2109,GSE33371,GSE43346,GSE99316,GSE28996,GSE108088,GSE108089
ALL	1187	46	GSE83536,GSE28460,GSE28462,GSE20910,GSE21094,GSE42038,GSE42040,GSE34880,GSE29986,GSE89565,GSE26865,GSE26878,GSE46474,GSE13159,GSE13204,GSE66099,GSE29044,GSE29691,GSE29919,GSE62782,GSE4607,GSE20489,GSE26713,GSE46449,GSE61629,GSE26049,GSE50628,GSE98793,GSE6
BLCA	153	7	GSE2109,GSE31684,GSE7476,GSE11783,GSE63626,GSE43346,GSE99316
BRCA	5879	87	GSE10780,GSE30010,GSE17907,GSE10810,GSE66159,GSE66162,GSE63626,GSE42568,GSE26910,GSE20086,GSE7700,GSE7307,GSE31448,GSE8977,GSE3744,GSE9086,GSE9196,GSE7904,GSE61304,GSE20711,GSE20713,GSE31138,GSE43346,GSE99316,GSE73613,GSE5460,GSE20685,GSE32646,GSE76124,GS
CESC	119	6	GSE2109,GSE63514,GSE6791,GSE3526,GSE75132,GSE7307
CHOL	11	2	GSE34166,GSE2109
COADREAD	2765	72	GSE47908,GSE38713,GSE9254,GSE5350,GSE37364,GSE41328,GSE10791,GSE53059,GSE17312,GSE33113,GSE33114,GSE20916,GSE62932,GSE63626,GSE40220,GSE77474,GSE14526,GSE37267,GSE13471,GSE30292,GSE7307,GSE14580,GSE16879,GSE10714,GSE43346,GSE99316,GSE22242,GSE13067,GSE648
DLBC	1729	27	GSE78513,GSE43346,GSE99316,GSE19246,GSE10846,GSE34171,GSE87371,GSE11318,GSE53786,GSE31312,GSE12195,GSE74266,GSE23501,GSE10524,GSE47355,GSE25638,GSE25639,GSE38885,GSE44337,GSE17189,GSE17372,GSE34339,GSE65988,GSE39503,GSE61578,GSE9031,GSE53820
ESCA	200	18	GSE22954,GSE32701,GSE106185,GSE34111,GSE26886,GSE51021,GSE100942,GSE42363,GSE2109,GSE17351,GSE33810,GSE3526,GSE7307,GSE40220,GSE63941,GSE63626,GSE43346,GSE99316
GBM	1109	61	GSE84422,GSE94349,GSE54565,GSE5281,GSE54566,GSE35864,GSE16969,GSE83670,GSE15209,GSE86574,GSE15824,GSE68015,GSE66354,GSE7621,GSE54572,GSE30563,GSE54567,GSE54568,GSE35493,GSE30643,GSE74195,GSE44593,GSE54571,GSE7307,GSE38010,GSE19728,GSE21354,GSE43346,GSE993
HNSC	279	28	GSE9600,GSE6791,GSE3292,GSE38517,GSE53355,GSE9844,GSE78060,GSE10300,GSE42743,GSE2109,GSE29330,GSE7788,GSE40568,GSE23117,GSE55267,GSE36820,GSE7224,GSE34573,GSE43409,GSE38494,GSE10746,GSE3526,GSE18490,GSE18674,GSE18676,GSE43346,GSE99316,GSE33846
KICH	264	19	GSE46699,GSE53757,GSE11151,GSE75693,GSE66270,GSE66272,GSE66271,GSE9489,GSE9493,GSE7869,GSE7307,GSE12606,GSE9492,GSE18969,GSE19249,GSE8050,GSE27556,GSE19982,GSE2109
KIRC	764	24	GSE2109,GSE66270,GSE66272,GSE41137,GSE53757,GSE14378,GSE22541,GSE85258,GSE12606,GSE66271,GSE47352,GSE8050,GSE18549,GSE11151,GSE46699,GSE75693,GSE19249,GSE9489,GSE9493,GSE9492,GSE7307,GSE27556,GSE18969,GSE7869
KIRP	277	19	GSE11151,GSE2109,GSE85258,GSE9489,GSE9493,GSE75693,GSE53757,GSE27556,GSE46699,GSE8050,GSE66271,GSE66272,GSE7307,GSE66270,GSE9492,GSE19249,GSE12606,GSE7869,GSE18969
LAML	929	38	GSE36076,GSE6460,GSE66099,GSE26049,GSE55201,GSE100340,GSE13159,GSE13204,GSE30195,GSE107968,GSE50628,GSE29044,GSE29691,GSE29919,GSE77791,GSE4607,GSE72754,GSE72798,GSE7307,GSE46449,GSE20489,GSE98793,GSE90970,GSE26713,GSE61629,GSE46474,GSE38511,GSE84844,GSE1
LGG	976	53	GSE5281,GSE16969,GSE84422,GSE83670,GSE54571,GSE94349,GSE54567,GSE7307,GSE35864,GSE86574,GSE54565,GSE44593,GSE54572,GSE54568,GSE19728,GSE21354,GSE54566,GSE15824,GSE68015,GSE7621,GSE74195,GSE35493,GSE38010,GSE15209,GSE66354,GSE30563,GSE30643,GSE17312,GSE229
LIHC	833	53	GSE107170,GSE102079,GSE102083,GSE11190,GSE6764,GSE29721,GSE29722,GSE23343,GSE75271,GSE75285,GSE98383,GSE28619,GSE13471,GSE15238,GSE15239,GSE41804,GSE31455,GSE11941,GSE11942,GSE84402,GSE62232,GSE6222,GSE14951,GSE63626,GSE83148,GSE7117,GSE7307,GSE74000,GSE1
LUAD	918	30	GSE40791,GSE33532,GSE19188,GSE19804,GSE33356,GSE24206,GSE18842,GSE31210,GSE30660,GSE16538,GSE10927,GSE69764,GSE7307,GSE27716,GSE27719,GSE28571,GSE28582,GSE50081,GSE29013,GSE12667,GSE2109,GSE10245,GSE43580,GSE31546,GSE31908,GSE10799,GSE27556,GSE26906,GSE18
LUSC	640	24	GSE28571,GSE28582,GSE43580,GSE10245,GSE30219,GSE2109,GSE50081,GSE29013,GSE8581,GSE33532,GSE25251,GSE27556,GSE18842,GSE31210,GSE19804,GSE33356,GSE40791,GSE24206,GSE19188,GSE10927,GSE30660,GSE16538,GSE7307,GSE69764
NSCLC	1413	36	GSE10927,GSE16538,GSE19188,GSE19804,GSE33356,GSE33532,GSE40791,GSE18842,GSE31210,GSE24206,GSE7307,GSE69764,GSE30660,GSE50081,GSE43580,GSE2109,GSE28571,GSE28582,GSE27716,GSE27719,GSE29013,GSE10245,GSE30219,GSE33363,GSE31546,GSE31908,GSE12667,GSE101929,GSE1
OVCA	1007	34	GSE18520,GSE18521,GSE14407,GSE40595,GSE54388,GSE15431,GSE105437,GSE28044,GSE38666,GSE23391,GSE23392,GSE15578,GSE36668,GSE43346,GSE99316,GSE2109,GSE9891,GSE9899,GSE14001,GSE26193,GSE39204,GSE18549,GSE12172,GSE65986,GSE20565,GSE63885,GSE9890,GSE10971,GSE666
PAAD	330	23	GSE15471,GSE71989,GSE46234,GSE7307,GSE43346,GSE99316,GSE15932,GSE32676,GSE32688,GSE16515,GSE17891,GSE2109,GSE106189,GSE42252,GSE34111,GSE42952,GSE14245,GSE50570,GSE51798,GSE49515,GSE18670,GSE27890,GSE22780
PRAD	387	17	GSE2109,GSE32448,GSE17951,GSE18549,GSE3325,GSE69223,GSE17906,GSE26910,GSE28403,GSE104749,GSE33316,GSE55945,GSE30522,GSE32982,GSE6369,GSE46602,GSE7307
SKCM	623	42	GSE68801,GSE14905,GSE72140,GSE39612,GSE65914,GSE48129,GSE16161,GSE65127,GSE33169,GSE7307,GSE46239,GSE69391,GSE59307,GSE7553,GSE70818,GSE32924,GSE53223,GSE20538,GSE16524,GSE38312,GSE5547,GSE15460,GSE15537,GSE32473,GSE18590,GSE80342,GSE32887,GSE43346,GSE993
STAD	1198	26	GSE54129,GSE62254,GSE66229,GSE51105,GSE15459,GSE15460,GSE35809,GSE64951,GSE22377,GSE39577,GSE34942,GSE57303,GSE57308,GSE19826,GSE13911,GSE51725,GSE78806,GSE79973,GSE2109,GSE44740,GSE17187,GSE42252,GSE34111,GSE23501,GSE7307,GSE54043
THCA	399	17	GSE60542,GSE35570,GSE65144,GSE43346,GSE99316,GSE6004,GSE53157,GSE7307,GSE3678,GSE85457,GSE10317,GSE76039,GSE33630,GSE82208,GSE29265,GSE2109,GSE3467
UCEC	279	12	GSE4888,GSE6364,GSE5809,GSE63626,GSE43346,GSE99316,GSE2109,GSE56026,GSE39099,GSE106191,GSE29436,GSE29437
